# Supplementary material for: Dependence of adhesive friction on surface roughness and elastic modulus
Source: Royal Society of Chemistry journal article supplement (doi:10.1039/d2sm00163b), 2022-01-01
Supplement: d2sm00163b1.pdf [file d2sm00163b1.pdf]

## Supporting Information

### Dependence of Adhesive Friction on Surface Roughness and Elastic Modulus

Daniel Maksuta,<sup>a</sup> Siddhesh Dalvi,<sup>b</sup> Abhijeet Gujrati,<sup>c</sup> Lars Pastewka,<sup>d</sup> Tevis DB Jacobs,<sup>c</sup> Ali Dhinojwala<sup>\*b</sup>

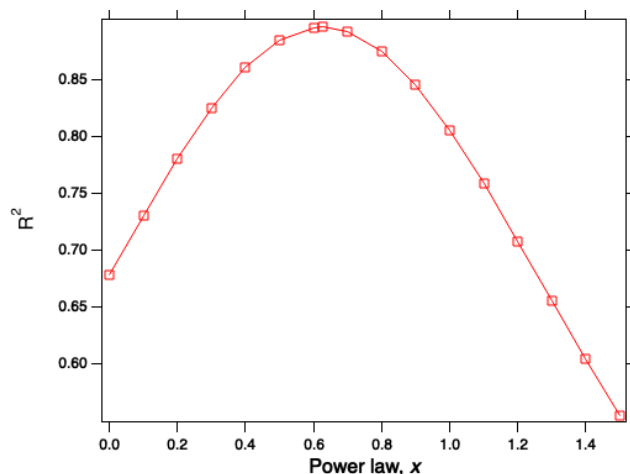

Figure S1: calculated  $R^2$  for figure versus modulus normalization exponent,  $E'^x$ , for figure 5b. Normalization is optimal at approximately 0.6274 with one standard deviation giving an upper and lower bound of about 0.5 and 0.75.

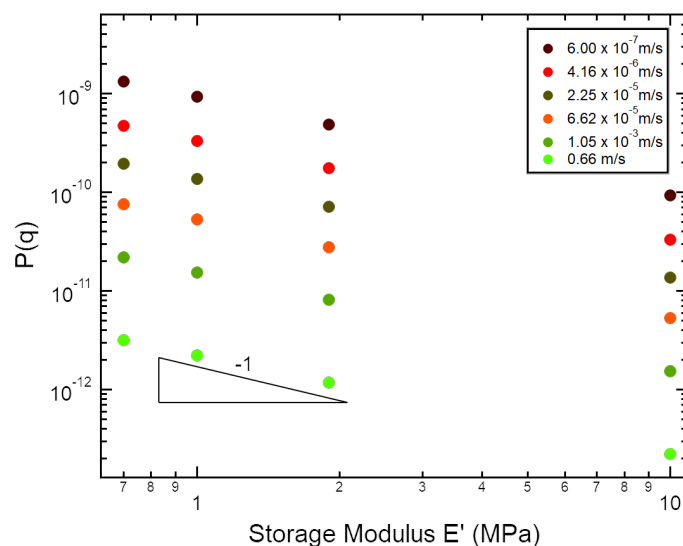

Figure S2. Calculated  $P(q)$  for four different moduli across a range of velocities for flat punch geometry. The slope of this graph implies that  $P(q)$  scales as  $1/E$ . Elastic modulus data from Ref. [1].

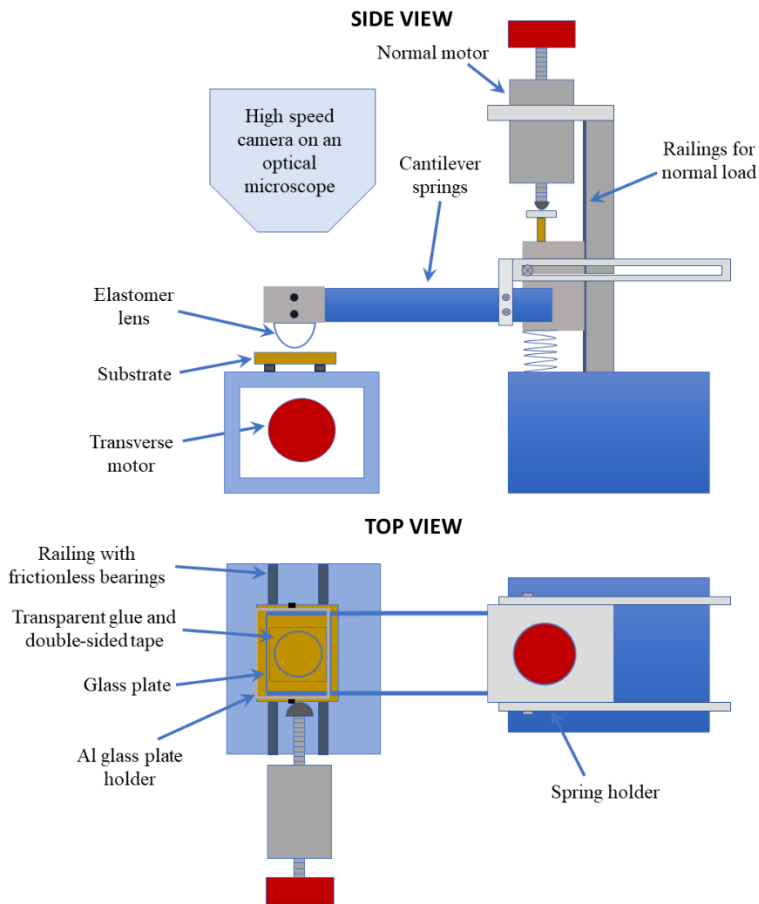

Figure S3. The double-cantilever setup for friction measurement through spring deflection and real-time area tracking through high-speed camera.<sup>[2]</sup>

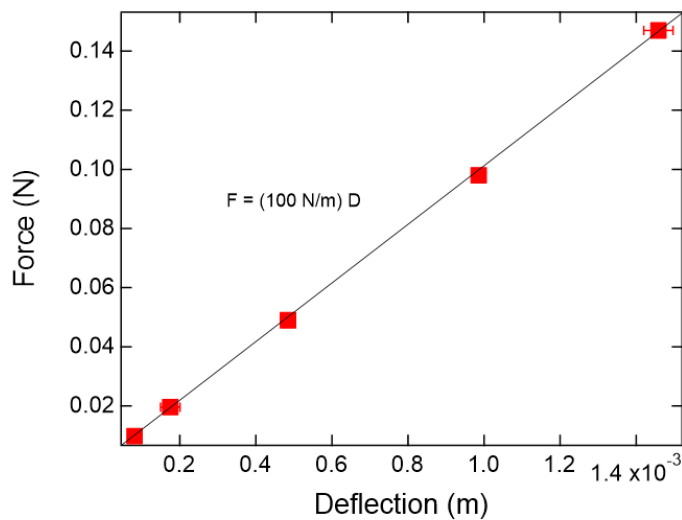

Figure S4. Spring constant calibration. Force was applied to the spring and the corresponding deflection was measured.

#### References

- [1] B. Lorenz, B. A. Krick, N. Mulakaluri, M. Smolyakova, S. Dieluweit, W. G. Sawyer, and B. N. J. Persson, *J. Phys. Condens. Matter*, 2013, 25, 225004.
- [2] K. Vorvolakos and M. K. Chaudhury, *Langmuir*, 2003, 19, 6778.
